# Supplementary material for: Evaluation of the efficacy and safety of cannabidiol-rich cannabis extract in children with autism spectrum disorder: randomized, double-blind, and placebo-controlled clinical trial
Source: PubMed Central journal article supplement (PMC11332686; doi:10.47626/2237-6089-2021-0396), 2024-02-28
Supplement: 2238-0019-trends-46-e20210396-suppl.pdf [file 2238-0019-trends-46-e20210396-suppl.pdf]

**Two-Way Mixed ANOVA (Psychomotor Agitation)**

|            | Df  | Sum Sq | Mean Sq | F value | Pr(>F)     |
|------------|-----|--------|---------|---------|------------|
| Time       | 1   | 14.70  | 14.700  | 9.225   | 0.00295 ** |
| Group      | 1   | 2.99   | 2.991   | 1.877   | 0.17334    |
| time:group | 1   | 0.94   | 0.937   | 0.588   | 0.44465    |
| Residuals  | 116 | 184.84 | 1.593   |         |            |

---Signif. codes: 0 '\*\*\*\*' 0.001 '\*\*' 0.01 '\*' 0.05 '.' 0.1 ' ' 1

**Two-Way Mixed ANOVA (Number of Meals)**

|            | Df  | Sum Sq | Mean Sq | F value | Pr(>F)  |
|------------|-----|--------|---------|---------|---------|
| Time       | 1   | 9.63   | 9.633   | 4.109   | 0.045 * |
| Group      | 1   | 4.24   | 4.236   | 1.807   | 0.182   |
| time:Group | 1   | 0.01   | 0.011   | 0.005   | 0.946   |
| Residuals  | 116 | 271.99 | 2.345   |         |         |

---Signif. codes: 0 '\*\*\*\*' 0.001 '\*\*' 0.01 '\*' 0.05 '.' 0.1 ' ' 1

**Two-Way Mixed ANOVA (Social Interaction)**

|            | Df  | Sum Sq | Mean Sq | F value | Pr(>F)      |
|------------|-----|--------|---------|---------|-------------|
| Time       | 1   | 17.63  | 17.633  | 14.133  | 0.000268*** |
| Group      | 1   | 4.49   | 4.490   | 3.599   | 0.60300     |
| time:group | 1   | 0.35   | 0.349   | 0.280   | 0.597960    |
| Residuals  | 116 | 144.73 | 1.248   |         |             |

---Signif. codes: 0 '\*\*\*\*' 0.001 '\*\*' 0.01 '\*' 0.05 '.' 0.1 ' ' 1

**Two-Way Mixed ANOVA (Anxiety)**

|            | Df  | Sum Sq | Mean Sq | F value | Pr(>F)  |
|------------|-----|--------|---------|---------|---------|
| Time       | 1   | 10.21  | 10.208  | 5.1989  | 0.0159* |
| Group      | 1   | 6.87   | 6.872   | 4.031   | 0.0470* |
| time:group | 1   | 0.51   | 0.512   | 0.300   | 0.5847  |
| Residuals  | 116 | 197.73 | 1.705   |         |         |

---Signif. codes: 0 '\*\*\*\*' 0.001 '\*\*' 0.01 '\*' 0.05 '.' 0.1 ' ' 1. (Time: Before or after / Group: treatment or control)

**Two-Way Mixed ANOVA (CONCENTRATION – MILD SEVERITY)**

|            | Df | Sum Sq | Mean Sq | F value | Pr(>F)   |
|------------|----|--------|---------|---------|----------|
| Time       | 1  | 5.76   | 5.558   | 6.747   | 0.0124 * |
| Group      | 1  | 2.33   | 2.327   | 2.825   | 0.0993   |
| time:group | 1  | 1.56   | 1.558   | 1.891   | 0.1755   |
| Residuals  | 48 | 39.54  | 0.824   |         |          |

--- Signif. codes: 0 '\*\*\*\*' 0.001 '\*\*' 0.01 '\*' 0.05 '.' 0.1 ' ' 1. (Time: before or after / Group: treatment or control).
